# Supplementary material for: Development and Evaluation of a Point-of-Care Test in a Low-Resource Setting with High Rates of Chlamydia trachomatis Urogenital Infections in Fiji
Source: PubMed Central journal article supplement (PMC8218753; doi:10.1128/jcm.00182-21), 2021-06-18
Supplement: jcm.00182-21-s0001.pdf [file jcm.00182-21-s0001.pdf]

## Supplemental Information

Development and evaluation of a Point-of-Care Test (POCT) in a low resource setting with high rates of *Chlamydia trachomatis* urogenital infections in Fiji

Deborah Dean<sup>a,b,c,d,e,f</sup>, Sumeetha Swaminathan<sup>b</sup>, Mike Kama<sup>f</sup>, Sophie Goemans<sup>b,g</sup>, Daniel Faktaufon<sup>f</sup>,  
Noor Alnabelseya<sup>e</sup>, Dawn Spelke<sup>e</sup>, Kamin Kahrizi<sup>e</sup>, Matthew Black<sup>e</sup>, Debkishore Mitra<sup>g</sup>

<sup>a</sup>Department of Medicine, University of California, San Francisco, CA, USA

<sup>b</sup>Department of Pediatrics, University of California, San Francisco, CA, USA

<sup>c</sup>Department of Bioengineering, University of California, San Francisco, CA, USA

<sup>d</sup>Department of Bioengineering, University of California, Berkeley, CA, USA

<sup>e</sup>Bixby Center for Global Reproductive Health, University of California, San Francisco, CA,  
USA

<sup>f</sup>Fiji Centre for Communicable Disease Control, Ministry of Health and Medical Services, Suva,  
Fiji

<sup>g</sup>Lucira Health, Emeryville, CA, USA

**TABLE S1.** Sexually transmitted, commensal and other pathogenic species screened for cross-reactivity with *C. trachomatis* primer sets.

| <b>Sexually transmitted organisms</b> | <b>Organisms involved in urogenital pathogenesis</b> | <b>Commensal Species</b>             | <b>Other</b>                |
|---------------------------------------|------------------------------------------------------|--------------------------------------|-----------------------------|
| <i>Neisseria gonorrhoeae</i>          | <i>Candida albicans</i>                              | <i>Enterococcus faecalis</i>         | <i>Chlamydia pneumoniae</i> |
| Human papilloma virus                 | <i>Bacteriodes ureolyticus</i>                       | <i>Escherichia coli</i>              | <i>Chlamydia psittaci</i>   |
| Herpes simplex virus 1                | <i>Bacteriodes fragilis</i>                          | <i>Haemophilus influenzae</i>        |                             |
| Herpes simplex virus 2                | <i>Gardnerella vaginalis</i>                         | <i>Klebsiella pneumoniae</i>         |                             |
| <i>Trichomonas vaginalis</i>          | <i>Mycoplasma hominis</i>                            | <i>Lactobacillus acidophilus</i>     |                             |
|                                       | <i>Ureaplasma urealyticum</i>                        | <i>Listeria monocytogenes</i>        |                             |
|                                       | <i>Mobiluncus curtisii</i>                           | <i>Micrococcus luteus</i>            |                             |
|                                       | <i>Bacillus subtilis</i>                             | <i>Peptostreptococcus anaerobius</i> |                             |
|                                       | <i>Mycoplasma genitalium</i>                         | <i>Pseudomonas aeruginosa</i>        |                             |
|                                       |                                                      | <i>Staphylococcus aureus</i>         |                             |
|                                       |                                                      | <i>Streptococcus pneumoniae</i>      |                             |
|                                       |                                                      | <i>Vibrio parahaemolyticus</i>       |                             |
|                                       |                                                      | <i>Yersinia enterocolitica</i>       |                             |
|                                       |                                                      | <i>Alcaligenes faecalis</i>          |                             |
|                                       |                                                      | <i>Arcanobacterium poymenes</i>      |                             |
|                                       |                                                      | <i>Candida tropicalis</i>            |                             |
|                                       |                                                      | <i>Corynebacterium genitalium</i>    |                             |
|                                       |                                                      | <i>Human Cytomegalovirus</i>         |                             |
|                                       |                                                      | <i>Lactobacillus delbrukkii</i>      |                             |
|                                       |                                                      | <i>Legionella pneumophila</i>        |                             |
|                                       |                                                      | <i>Mycobacterium smegmatis</i>       |                             |
|                                       |                                                      | <i>Neisseria mucosa</i>              |                             |
|                                       |                                                      | <i>Providencia stuartii</i>          |                             |
|                                       |                                                      | <i>Pseudomonas putida</i>            |                             |
|                                       |                                                      | <i>Rhodospirillum rubrum</i>         |                             |
|                                       |                                                      | <i>Saccharomyces cerevisiae</i>      |                             |
